# Supplementary material for: Room-temperature, solution-processable organic electron extraction layer for high-performance planar heterojunction perovskite solar cells
Source: Royal Society of Chemistry journal article supplement (doi:10.1039/c5nr04250j), 2015-01-01
Supplement: c5nr04250j1.pdf [file c5nr04250j1.pdf]

## Supplementary Information

### Room-Temperature, Solution-Processable Organic Electron Extraction Layer for High-Performance Planar Heterojunction Perovskite Solar Cells

Jong H. Kim,<sup>a,b,c</sup> Chu-Chen Chueh,<sup>c</sup> Spencer T. Williams<sup>c</sup> and Alex K.-Y. Jen<sup>\*c,d</sup>

<sup>a</sup>. Department of Chemical Engineering Education, Chungnam National University, 99 Daehak-ro, Yuseong-gu, 305-764, South Korea.

<sup>b</sup>. Graduate School of Energy Science and Technology, Chungnam National University, 99 Daehak-ro, Yuseong-gu, 305-764, South Korea.

<sup>c</sup>. Department of Materials Science and Engineering, University of Washington, Seattle, WA, 98195-2120, USA.

<sup>d</sup>. Department of Chemistry, University of Washington, Seattle, WA, 98195-1700, USA.

\*Address correspondence to: [ajen@u.washington.edu](mailto:ajen@u.washington.edu)

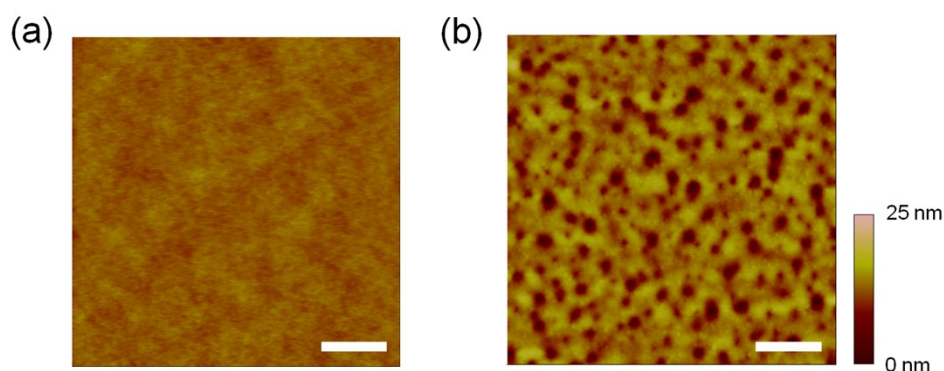

**Figure S1.** Atomic force microscopy images of FPI-PEIE and PC<sub>61</sub>BM on FPI-PEIE (scale bar: 1 μm).

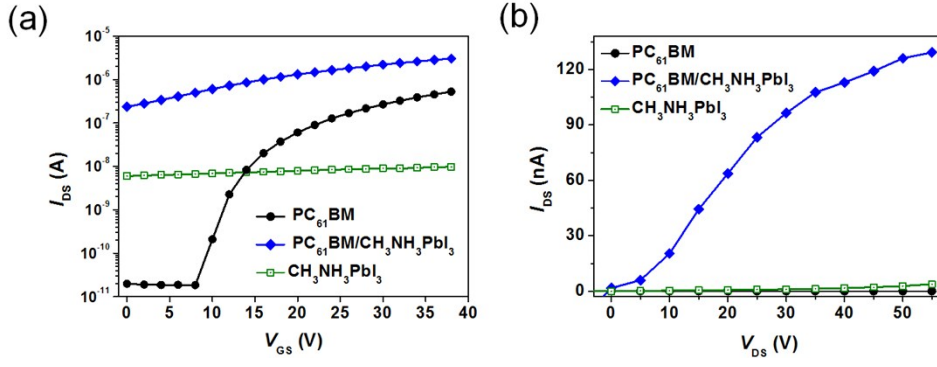

**Figure S2.** (a) Transfer characteristics of field-effect transistors based on pristine PC<sub>61</sub>BM (circles), pristine CH<sub>3</sub>NH<sub>3</sub>PbI<sub>3</sub> (squares) and PC<sub>61</sub>BM/CH<sub>3</sub>NH<sub>3</sub>PbI<sub>3</sub> (diamonds), and (b) output characteristics of field-effect transistors based on pristine PC<sub>61</sub>BM (circles), pristine CH<sub>3</sub>NH<sub>3</sub>PbI<sub>3</sub> (squares) and PC<sub>61</sub>BM/ CH<sub>3</sub>NH<sub>3</sub>PbI<sub>3</sub> (diamonds) at zero gate voltage.

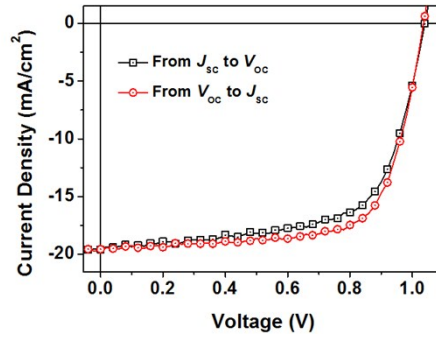

**Figure S3.**  $J$ - $V$  characteristics of the studied CH<sub>3</sub>NH<sub>3</sub>PbI<sub>3</sub> solar cell based on FPI-PEIE/PC<sub>61</sub>BM layer under AM 1.5G irradiation at 100 mW cm<sup>-2</sup>. The scan rate is 0.05 V s<sup>-1</sup>.

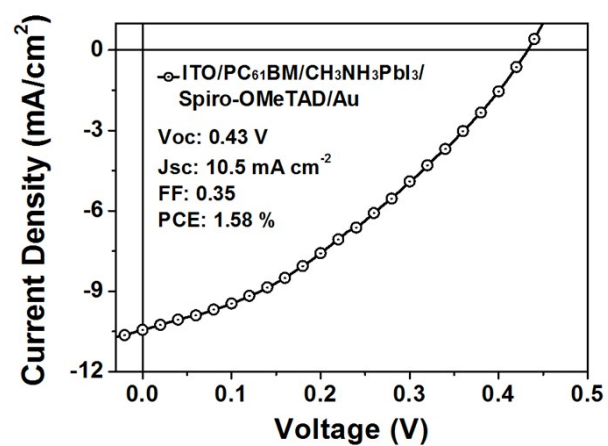

**Figure S4.**  $J$ - $V$  characteristics of the control perovskite solar cell using a single PC<sub>61</sub>BM layer as the EEL under AM 1.5G irradiation at 100 mW cm<sup>-2</sup>.
